# Supplementary material for: Evaluating the 11-year solar cycle and short-term 10 Be deposition events with novel excess water samples from the East Greenland Ice-core Project (EGRIP)
Source: Copernicus journal article supplement (doi:10.5194/cp-19-2409-2023), 2023-11-22
Supplement: Supplementary file 1 [file cp-19-2409-2023-supplement.zip]

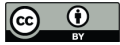

*Supplement of*

**Evaluating the 11-year solar cycle and short-term  $^{10}\text{Be}$  deposition events with novel excess water samples from the East Greenland Ice-core Project (EGRIP)**

**Chiara I. Paleari et al.**

*Correspondence to:* Chiara I. Paleari ([chiara.paleari@geol.lu.se](mailto:chiara.paleari@geol.lu.se))

- [cp-19-2409-2023-supplement-title-page.pdf](#)
- [Datasets\\_EGRIPS6\\_CFAsamples.xlsx](#)

The copyright of individual parts of the supplement might differ from the article licence.
