# Supplementary material for: Evaluating the 11-year solar cycle and short-term 10 Be deposition events with novel excess water samples from the East Greenland Ice-core Project (EGRIP)
Source: Copernicus journal article supplement (doi:10.5194/cp-19-2409-2023), 2023-11-22
Supplement: Supplementary file 2 [file cp-19-2409-2023-supplement.zip]

Archive with 2 entries (2 files):
- cp-19-2409-2023-supplement-title-page.pdf
- Datasets_EGRIPS6_CFAsamples.xlsx
