# Supplementary material for: Evaluating the 11-year solar cycle and short-term 10 Be deposition events with novel excess water samples from the East Greenland Ice-core Project (EGRIP)
Source: Copernicus journal article supplement (doi:10.5194/cp-19-2409-2023), 2023-11-22
Supplement: Supplementary file 2 [file cp-19-2409-2023-supplement.zip › Datasets_EGRIPS6_CFAsamples.xlsx]

## Sheet: Sheet1
Depth top (m)	Depth bottom (m)	Age top (Year CE)	Age bottom (Year CE)	10Be conc. (x10^4 atoms/g)	Error abs.
4	4.36	2008.87	2007.73	1.27	0.06
4.36	4.72	2007.73	2006.69	1.94	0.08
4.72	5.08	2006.69	2005.57	1.3	0.06
5.08	5.42	2005.57	2004.53	1.01	0.05
5.42	5.76	2004.53	2003.42	0.96	0.05
5.76	6.1	2003.42	2002.11	0.92	0.05
6.1	6.44	2002.11	2000.61	1	0.05
6.44	6.78	2000.61	1999.23	0.98	0.05
6.78	7.12	1999.23	1997.98	1.25	0.07
7.12	7.46	1997.98	1996.91	1.28	0.06
7.46	7.8	1996.91	1995.77	1.31	0.06
7.8	8.09	1995.77	1994.73	1.2	0.07
8.09	8.38	1994.73	1993.75	1.74	0.08
8.38	8.67	1993.75	1992.71	1.83	0.07
8.67	8.95	1992.71	1991.71	1.67	0.07
8.95	9.24	1991.71	1990.58	1.67	0.07
9.24	9.52	1990.58	1989.4	1.29	0.07
9.52	9.81	1989.4	1988.29	1.26	0.17
9.81	10.1	1988.29	1987.06	1.31	0.08
10.1	10.38	1987.06	1985.32	1.47	0.07
10.38	10.67	1985.32	1984.09	1.22	0.07
10.67	10.94	1984.09	1983.01	1.43	0.06
10.94	11.17	1983.01	1981.89	1.39	0.07
11.17	11.41	1981.89	1980.99	1.24	0.06
11.41	11.65	1980.99	1980.01	1.33	0.06
11.65	11.88	1980.01	1978.32	1.37	0.06
11.88	12.12	1978.32	1976.47	1.34	0.06
12.12	12.35	1976.47	1975.08	1.31	0.07
12.35	12.59	1975.08	1973.82	1.38	0.07
12.59	12.83	1973.82	1972.53	1.62	0.07
12.83	13.06	1972.53	1971.25	1.47	0.07
13.06	13.31	1971.25	1970	1.28	0.06
13.31	13.56	1970	1968.92	1.12	0.06
13.56	13.81	1968.92	1967.67	1.39	0.1
13.81	14.06	1967.67	1966.37	1.45	0.07
14.06	14.31	1966.37	1965.23	1.06	0.06
14.31	14.56	1965.23	1964	1.8	0.09
14.56	14.81	1964	1962.75	1.85	0.07
14.81	15.06	1962.75	1961.58	1.13	0.06
15.06	15.29	1961.58	1960.59	1.15	0.06
15.29	15.53	1960.59	1959.58	1.72	0.09
15.53	15.76	1959.58	1958.48	1.02	0.06
15.76	16	1958.48	1957.32	1.1	0.06
16	16.24	1957.32	1956.12	1.66	0.07
16.24	16.47	1956.12	1955.15	1.15	0.06
16.47	16.71	1955.15	1954.09	1.4	0.06
16.71	16.94	1954.09	1952.93	1.56	0.07
16.94	17.17	1952.93	1951.68	1.17	0.06
17.17	17.39	1951.68	1950.16	1.4	0.07
17.39	17.61	1950.16	1948.98	1.29	0.06
17.61	17.83	1948.98	1947.53	1.12	0.06
17.83	18.06	1947.53	1946.22	0.98	0.06
18.06	18.28	1946.22	1944.98	0.98	0.07
18.28	18.5	1944.98	1943.69	1.48	0.06
18.5	18.72	1943.69	1942.29	1.54	0.07
18.72	18.94	1942.29	1940.89	1.56	0.06
18.94	19.17	1940.89	1939.5	1.44	0.07
19.17	19.39	1939.5	1938.31	1.23	0.07
19.39	19.61	1938.31	1937.05	1.43	0.07
19.61	19.83	1937.05	1935.75	1.39	0.06
19.83	20.06	1935.75	1934.26	1.7	0.08
20.06	20.28	1934.26	1932.97	1.5	0.07
20.28	20.5	1932.97	1931.78	1.42	0.06
20.5	20.72	1931.78	1930.39	1.78	0.07
20.72	20.94	1930.39	1929.24	1.57	0.07
20.94	21.17	1929.24	1928.19	1.09	0.08
21.17	21.39	1928.19	1927.22	1.18	0.06
21.39	21.61	1927.22	1926.33	1.56	0.08
21.61	21.83	1926.33	1925.46	1.29	0.07
21.83	22.06	1925.46	1924.37	1.45	0.06
22.06	22.29	1924.37	1922.91	1.51	0.07
22.29	22.53	1922.91	1921.39	1.2	0.07
22.53	22.76	1921.39	1919.78	1.36	0.07
22.76	23	1919.78	1917.94	1.25	0.07
23	23.22	1917.94	1916.4	1.23	0.07
23.22	23.44	1916.4	1915.13	2.11	0.08
23.44	23.67	1915.13	1913.92	1.72	0.07
23.67	23.89	1913.92	1912.81	1.6	0.08
23.89	24.1	1912.81	1911.65	1.4	0.08
24.1	24.31	1911.65	1910.19	1.67	0.08
24.31	24.52	1910.19	1908.59	1.79	0.09
24.52	24.73	1908.59	1907.39	1.93	0.08
24.73	24.94	1907.39	1906.21	2.1	0.09
24.94	25.17	1906.21	1905.01	1.42	0.07
25.17	25.39	1905.01	1904	2.67	0.09
25.39	25.61	1904	1902.82	2.04	0.1
25.61	25.83	1902.82	1901.52	1.95	0.1
25.83	26.05	1901.52	1900.57	1.48	0.09
